# Potential universal PCR method to detect decapod hepanhamaparvovirus (DHPV) in crustaceans

Jiraporn Srisala<sup>1</sup>, Dararat Thaiue<sup>1</sup>, Piyachat Sanguanrut<sup>1</sup>,  
Diva January Aldama-Cano<sup>1</sup>, Timothy W. Flegel<sup>2,3</sup>, Kallaya Sritunyalucksana<sup>1,\*</sup>

<sup>1</sup>Aquatic Animal Health Research Team (AQHT), Integrative Aquaculture Biotechnology Research Group, National Center for Genetic Engineering and Biotechnology (BIOTEC), National Science and Technology Development Agency (NSTDA), Yothi office, Rama VI Rd., Bangkok, Thailand 10400

<sup>2</sup>Center of Excellence for Shrimp Molecular Biology and Biotechnology (Centex Shrimp), Faculty of Science, Mahidol University, Rama VI Rd., Bangkok, Thailand 10400

<sup>3</sup>National Center for Genetic Engineering and Biotechnology (BIOTEC), National Science and Technology Development Agency (NSTDA), Thailand Science Park, Klong Luang, Pathumthani, Thailand 12120

\*Corresponding author : e-mail address: [Kallaya@biotec.or.th](mailto:Kallaya@biotec.or.th)

## ABSTRACT

Parvoviruses that infect the hepatopancreas (HP) of the penaeid shrimp *Penaeus chinensis*, *P. monodon*, and *P. merquiensis* were previously called hepatopancreatic parvoviruses (HPV). They are now classified in the family *Parvoviridae*, sub-family *Hamaparvovirinae* as members of the same genus called *Hepanhamaparvovirus* and referred to as decapod hepanhamaparvovirus, designated here as DHPV. However, a virus that causes similar lesions in the HP of the giant river prawn *Macrobrachium rosenbergii* resembles hepanhamaparvoviruses by microscopy and histochemistry. Unfortunately, no genome information is yet available and PCR detection methods that work for DHPV in *P. monodon* do not work with *M. rosenbergii*. For hatchery samples of *M. rosenbergii* in Thailand with DHPV-like lesions, we hypothesized it might be possible to design primer pairs from 8 full DHPV genome sequences at GenBank for use in PCR detection of DHPV in *M. rosenbergii*. Using this strategy, we successfully designed a new set of primers and a PCR protocol called the DHPV-U method that gave an amplicon with DNA extracts from larvae of *M. rosenbergii* samples that showed DHPV-like lesions, while extracts from normal larvae gave none. DNA extracts from *P. monodon* infected with DHPV also gave amplicons. At the same time, the normal PCR method for DHPV in *P. monodon* gave no amplicon with the *M. rosenbergii* DNA extracts. The DHPV-U amplicons from *P. monodon* and *M. rosenbergii* shared 99% sequence identity, and *in situ* hybridization (ISH) assays using the DIG-labeled amplicon gave positive histochemical results in the HP tissue of both *P. monodon* and *M. rosenbergii*. The DHPV-U method is now being used in Thailand for detection of DHPV in both *P. monodon* and *M. rosenbergii*. Overall, the results support the proposal that the HP virus in *M. rosenbergii* is also a

40 hepanhamaparvovirus. Based on 100% sequence identity of the target region in the currently  
41 published DHPV sequences at GenBank, the DHPV-U method may also work for detection of  
42 other DHPV isolates.

43

#### 44 **Keywords**

45 *Parvoviridae*; *Hamaparvovirinae*; Decapod hepanhamaparvovirus; DHPV; Hepatopancreatic  
46 parvovirus; HPV; *Macrobrachium rosenbergii*, *Penaeus monodon*; PCR detection;

47

#### 48 **1. INTRODUCTION**

49 Parvoviruses that infect the hepatopancreas (HP) of the penaeid shrimp *P. chinensis*, *P. monodon*,  
50 and *P. merquiensis* were previously called hepatopancreatic parvoviruses (HPV) (Lightner,  
51 1996a). They are now classified in the family *Parvoviridae*, subfamily *Hamaparvovirinae* as  
52 members of a single species called decapod hepanhamaparvovirus 1 (Pénzes, et al., 2020),  
53 abbreviated here as DHPV. There were 8 full sequences listed at GenBank as *Hepandensovirus*  
54 and derived from the three penaeid shrimp species above. However, there is another virus that  
55 causes similar lesions in the HP of the giant river prawn *Macrobrachium rosenbergii* (Anderson,  
56 et al., 1990; Lightner, et al., 1994). Preliminary work by electron microscopy and histochemistry  
57 (Gangnonngiw, et al., 2009) suggested that the *M. rosenbergii* virus was also a parvovirus.  
58 However, no genome information was available, and it could not be detected using PCR methods  
59 designed for DHPV detection in *P. monodon* (Gangnonngiw, et al., 2009). DHPV was first  
60 reported from Thailand in *P. monodon* specimens (Flegel, et al., 1992) and it has been associated  
61 with retarded growth, disease and mortality in juvenile shrimp (Flegel, et al., 1999; Lightner, et  
62 al., 1993). However, DHPV (called HPV at the time) was later removed from the OIE list of  
63 reportable diseases after analysis showed there was no negative economic effect on the aquaculture  
64 industry due to the ability to exclude it from production facilities (Thitamadee, et al., 2016).  
65 Although HP lesions similar to those of DHPV in *P. monodon*, *P. megquiensis* and *P. chinensis*  
66 have been reported in other wild and cultured penaeid shrimp species including *P. esculentus*, *P.*  
67 *japonicus*, *P. semisulcatus*, *P. indicus*, *P. penicillatus*, *P. schmitti*, *P. vannamei* and *P. stylirostris*  
68 and in the Palaemonid shrimp *Macrobrachium rosenbergii* (Lightner, 1996b) genome sequence  
69 information is lacking, except for a few species (Walsh, et al., 2017), or it is insufficient to  
70 determine whether or how closely related they are to DHPV in *P. monodon*.

71

72 The most common diagnostic method that has been used for DHPV detection is histological  
73 analysis of the hepatopancreatic tubule cells by H&E staining to reveal pathognomonic lesions  
74 characterized by eosinophilic to basophilic, intranuclear inclusions contained in hypertrophied  
75 nuclei of hepatopancreatic tubule epithelial cells (Flegel, et al., 1999; Lightner, et al., 1993).  
76 Molecular detection can also be carried out by PCR following OIE standard methods (OIE, 2007)  
77 or by using DNA probes for *in situ* hybridization (Flegel, et al., 1999; Manjanaik, et al., 2005;  
78 Phromjai, et al., 2001). However, sensitivity of the methods may vary depending on the host

79 species and/or its geographical location due to differences in some portions of the genomes among  
80 the DHPV isolates (Dhar, et al., 2014; Phromjai, et al., 2001; Tang, et al., 2008).

81

82 From 2016-2018, a project to develop specific pathogen free (SPF) *M. rosenbergii* contacted our  
83 research unit to diagnose the cause of unexpected mortality in larvae from a screening program to  
84 select a founder stock. The affected larvae showed typical DHPV-like lesions, as had previously  
85 been reported (Anderson, et al., 1990; Gangnonngiw, et al., 2009). At the same time, several full  
86 sequences of DHPV had accumulated at GenBank, and we hypothesized that, if the virus in *M.*  
87 *rosenbergii* was also a hepanhamaparvovirus, we might be able to design a PCR detection method  
88 for it from regions of high sequence identity among the reported isolates of DHPV. Here we report  
89 the success of this approach and its confirmation by *in situ* hybridization analysis. At the same  
90 time, analysis of the amplicon sequence supports the proposal that the lesions in *M. rosenbergii*  
91 are also caused either directly or indirectly by a hepanhamaparvovirus.

92

## 93 2. MATERIALS AND METHODS

### 94 2.1. *Shrimp specimens*

95 Two batches of PLs of *Macrobrachium rosenbergii* (~7-14 mm in length) exhibiting signs of a  
96 suspected disease outbreak were obtained in December 2017 and January 2018 from a hatchery in  
97 Suphanburi province, Thailand. Batch #1 (40 PLs 12-14 mm in length) was divided into 2  
98 subgroups: one subgroup (30 PLs) was divided into 3 tubes containing 10 PLs each in 500 µl of  
99 TF lysis buffer (50 mM Tris-HCl, 100 mM EDTA, 50 mM NaCl, 2% SDS, 10 µg/ml proteinase  
100 K, pH 9.0) for DNA extraction, while the remaining 10 were fixed in Davidson's fixative for  
101 histological analysis individually in 10 paraffin blocks. Similarly, Batch #2 (114 PLs 7-10 mm in  
102 length) was divided into 2 subgroups: one subgroup (100 PLs) was divided into 10 tubes containing  
103 10 PLs each in 500 µl of TF lysis buffer as above while the remaining 14 PLs were fixed with the  
104 Davidson's fixative. The fixed PLs were processed for histological analysis in two paraffin blocks  
105 containing 7 PLs each. Archived DNA extracts and an archived paraffin block of tissue from *P.*  
106 *monodon* infected with DHPV1 were used for analysis in comparison with the samples from *M.*  
107 *rosenbergii*.

108

109 At the time this work was carried out, there was no official standard of the Ethical Principles and  
110 Guidelines for the Use of Animals of the National Research Council of Thailand (1999) for  
111 invertebrates. However, its principles for vertebrates were adapted for prawn specimens. The  
112 guidelines of the New South Wales (Australia) state government for the humane harvesting of fish  
113 and crustaceans were followed (<http://www.dpi.nsw.gov.au/agriculture/livestock/animal-welfare/general/fish/shellfish>) with respect to processing of the prawns for analysis. The  
114 saltwater/ice slurry method was used as recommended in the Australian guidelines.

116

117

118

## 119 2.2 Histological analysis

120 For histological analysis, the living PL of *M. rosenbergii* specimens were stunned an ice slurry  
121 and immediately fixed whole with Davidson's fixative solution overnight before processing for  
122 hematoxylin and eosin (H&E) staining (Bell Lightner, 1988). After that, the hepatopancreatic  
123 tissue of each specimen was screened by light microscopy for the presence of DHPV-like lesions.  
124 Sections of the same paraffin-embedded tissues were used for *in situ* hybridization assays.

125

## 126 2.3 Nucleic acid extraction for PCR amplification

127 The 13 *M. rosenbergii* subsamples of 10 PL each were processed first by removal of eyestalks (to  
128 avoid PCR interference) before homogenization in 500 µl of TF lysis buffer [50 mM Tris-HCl (pH  
129 9.0), 100 mM EDTA, 50 mM NaCl, 2%SDS, 10 µg/ml Proteinase K] and incubated for 1 h at 60-  
130 65°C. Total DNA was purified following the standard phenol: chloroform: isoamyl alcohol  
131 protocol (Sambrook Russell, 2001 ) and the DNA pellet obtained was resuspended with 30 µl of  
132 DNase/RNase free water. Concentration of DNA was determined using a dsDNA BR assays on a  
133 Qubit 3.0 Fluorometer (Life Technologies) and stored at -20°C until used.

134

## 135 2.4 Design of PCR primers

136 A new set of primers for DHPV detection was designed base on highly conserved sequences of 8  
137 selected DHPV genome sequences available at the GenBank database (**Table 1**). The name  
138 assigned to this primer set was decapod hepanhamaparvovirus universal primers or DHPV-U  
139 primers. The nucleotide sequences of the DHPV-U primers and the existing OIE primers used in  
140 the study are listed in Table 2.

141

142

143 **Table 1.** Nucleotide sequences of complete or almost complete genomes used for multiple sequence  
144 alignment analysis for the construction of the DHPV-U primers. The virus names used in the table are those  
145 that were used at GenBank at the time of writing. In this article, the penaeid shrimp binomials used are  
146 according to Holthuis (1980) and Flegel (2007).

147

| Host Species          | Virus name                          | Accession No.                         |
|-----------------------|-------------------------------------|---------------------------------------|
| <i>P. monodon</i>     | Penaeus monodon hepandensovirus 1   | DQ002873.1                            |
|                       | Penaeus monodon hepandensovirus 2   | JN082231.1,                           |
|                       | Penaeus monodon hepandensovirus 3   | EU588991.1                            |
|                       | Penaeus monodon hepandensovirus 4   | FJ410797.2                            |
| <i>P. chinensis</i>   | Penaeus chinensis hepandensovirus   | GU371276.1, AY008257.2,<br>EU247528.1 |
| <i>P. merquiensis</i> | Penaeus merguiensis hepandensovirus | DQ458781.4                            |

148

149

150

151 **Table 2.** Primers used for PCR amplification in this study.

152

| Method   | Primer name   | Sequence (5'-3')        | Type of Reaction | Amplicon size (bp) | References                                |
|----------|---------------|-------------------------|------------------|--------------------|-------------------------------------------|
| DHPV-OIE | DHPV-441F     | GCATTACAAGAACCAAGCAG    | Nested PCR       | 441                | OIE 2007 (Phromjai <i>et al.</i> , 2002)  |
|          | DHPV-441R     | ACACTCAGCCTCTACCTTGT    |                  |                    |                                           |
|          | DHPV nF       | ATAGAACGCATAGAAAACGCT   |                  | 265                | OIE 2007 (Manjanaik <i>et al.</i> , 2005) |
|          | DHPV nR       | GGTGGCGCTGGAATGAATCGCTA |                  |                    |                                           |
| DHPV-U   | DHPV-U 1538 F | CCTCTTGTTACATTTTACTC    | Semi-nested PCR  | 350                | This study                                |
|          | DHPV-U 1887 R | GATGTCTTCTGTAGTCC       |                  |                    |                                           |
|          | DHPV-U 1622 F | AAGTTTGCACAGTGGTTGT     |                  | 266                |                                           |

153

## 154 2.5 PCR methods

155 For the DHPV-OIE method, the primers listed in Table 2 by Phromjai *et al.* (Phromjai, et al.,  
 156 2002) and Manjanaik *et al.* (Manjanaik, et al., 2005) were used, and the reaction was performed  
 157 following the OIE-manual PCR detection method. For the DHPV-U method, the first step PCR  
 158 reaction was performed in a 12.5 µl mixture containing 1X OneTaq Hot Start Master Mix (NEB),  
 159 0.4 µM of each DHPV-U 1538F and DHPV-U 1887R primer and 20 ng of DNA template. The  
 160 PCR protocol was initial denaturation for 5 min at 94°C followed by 30 cycles of denaturation for  
 161 30 s at 94°C, annealing for 30 s at 55°C and extension for 45 s at 72°C with a final extension for 5  
 162 min at 72°C. For the semi-nested PCR step, the 12.5 µl reaction mixture contained 1X OneTaq  
 163 Hot Start Master Mix (NEB), 0.2 µM of each DHPV-U 1622F and DHPV-U 1887R primers and 1  
 164 µl of PCR product from the first-step PCR reaction. The PCR protocol was initial denaturation for  
 165 5 min at 94°C followed by 25 cycles of denaturation for 30 s at 94°C, annealing for 30 s at 55°C  
 166 and extension for 30 s at 72°C with a final extension for 5 min at 72°C. The amplicons were  
 167 analyzed by 1.5% agarose gel electrophoresis with ethidium bromide staining and using a DNA  
 168 ladder marker (2 log DNA ladder from New England Biolabs, USA). Amplicon bands were  
 169 observed under UV light. The expected amplicons were for light infections one 266 bp band and  
 170 for heavy infections one 266 bp band plus one 350 bp band. The PCR products obtained were  
 171 cloned into pGEM-T-Easy vector and subjected to bi-directional sequencing (Macrogen, Korea).

172

## 173 2.6 Specificity and sensitivity of the DHPV-U method

174 To determine the sensitivity of the DHPV-U method, a recombinant pGEM-T plasmid was  
 175 constructed to contain a DHPV amplicon and it was used as a template at 10-fold serial dilutions  
 176 in corresponding PCR reactions. The highest dilution that still gave a visible band on the agarose  
 177 gel was considered the lowest detectable quantity of target DNA, and the equivalent copy number  
 178 was calculated using Avogadro's number against the molar quantity of plasmid DNA. To  
 179 determine the specificity of the DHPV-U primer, crustacean samples severely infected with other

180 viruses were tested. These included archived DNA and RNA extracted from *P. vannamei* severely  
181 infected with either white spot syndrome virus (WSSV), yellow head virus (YHV) or Infectious  
182 myonecrosis virus (IMNV), and from *P. monodon* severely infected with infectious hypodermal  
183 and haematopoietic necrosis virus (IHHNV) or Laem Singh virus (LSNV). For WSSV, YHV and  
184 IMNV, the IQ2000 kits for detection (GeneReach, Taiwan) of each virus were used. For IHHNV,  
185 the levels of infection were determined by the OIE method following Tang et al. (Tang, et al.,  
186 2007). For LSNV, the PCR method followed Sritunyalucksana et al., 2006 (Sritunyalucksana, et  
187 al., 2006). For the YHV-, IMNV-, and LSNV-infected shrimp, the RNA was extracted and  
188 subjected to the Superscript<sup>TM</sup> III Reverse transcriptase (Invitrogen, USA) before the cDNA was  
189 used as the template for the DHPV-U method. Archived DNA extracts from *P. monodon* infected  
190 with DHPV were also used to compare the DHPV-O and DHPV-U methods.

191

## 192 **2.7 *In situ* hybridization (ISH) assays using a DHPV-U-derived probe**

193 The *in situ* hybridization tests were carried out using paraffin blocks containing DHPV-PCR  
194 positive PL of *M. rosenbergii* collected in this study and using archived blocks of DHPV-PCR  
195 positive juvenile stages of *P. monodon*. Digoxigenin (DIG)-labeled DNA probes (Roche,  
196 Germany) were generated by PCR according to the manufacturer's instructions. The primers used  
197 for the labeling reactions were DHPV-U 1622F and DHPV-U 1887R. The PCR reaction was  
198 performed in 25 µl containing 0.4 µM of each primer, 1X PCR buffer [200 mM Tris-HCl (pH 8.4),  
199 500 mM KCl], 1X PCR DIG labeling mix (Roche, USA), 1.5 mM MgCl<sub>2</sub>, 1.25 U *Taq* DNA  
200 polymerase (Invitrogen, USA) and 2x10<sup>6</sup> copies of a plasmid clone containing the DHPV  
201 amplicon. The labeled PCR product was purified using a PCR purification kit (Geneaid, Taiwan)  
202 and stored in DNase/RNase free water at -20° C until used.

203

204 The protocol for ISH was as previously described (Sritunyalucksana, et al., 2006; Tangprasittipap,  
205 et al., 2013). Briefly, tissue sections were deparaffinized and rehydrated before being digested  
206 with 200 µl of 5 µg/ml Proteinase K (Invitrogen, USA) in TNE buffer for 1 h at 37°C. The sections  
207 were incubated in 0.5M EDTA at room temperature (~25°C) for 1 h before being fixed with ice  
208 cold 0.4% formaldehyde solution for 5 min and immersed in distilled water for 5 min. The sections  
209 were equilibrated with pre-hybridization solution [4 × SSC and 50% (v/v) deionized formamide]  
210 at 37°C for 1 h. After that, the sections were replaced with hybridization solution containing the  
211 DIG-labeled probe (approximately 400 ng/ slide) and covered with a coverslip. The control  
212 reaction without probe was included in a separate container. The hybridization reaction was  
213 incubated at 42°C overnight in a humid chamber. After incubation, the sections were washed  
214 sequentially for 10 min with 2X SSC, 15 min with 2XSSC at 37°C, 15 min with 1XSSC at 42°C,  
215 15 min with 0.5X SSC at 42°C and 5 min with buffer I [100 mM Tris-HCl and 150 mM NaCl, pH  
216 7.5] at room temperature. After washing, the sections were equilibrated with buffer II [Buffer I  
217 containing 0.5% Blocking reagent (Roche, Germany)] at room temperature for 1 h before  
218 incubation with alkaline phosphatase-conjugated anti-digoxigenin antibody (1:500 dilution). The  
219 sections were washed 2x10 min with buffer I and equilibrated in detection buffer (100 mM Tris-



260 JN082231.1 AGTAAAGTAAGAAAGTTTTGTAT AAGTTTGCACAGTGGTTGTATAAGGAATGTACATAC  
 261 AY008257.2 AGTAAAGTAAGAAAGTTTTGTAT AAGTTTGCACAGTGGTTGTATAAGGAATGTACATAC  
 262 GU371276.1 AGTAAAGTAAGAAAGTTTTGTAT AAGTTTGCACAGTGGTTGTATAAGGAATGTACATAC  
 263 EU588991.1 AGTAAAGTAAGAAAGTTCTGTAT AAGTTTGCACAGTGGTTGTATAAGGAATGTACATAC  
 264 EU247528.1 AGTAAAGTAAGAAAGTTCTGTAT AAGTTTGCACAGTGGTTGTATAAGGAATGTACATAC  
 265 DQ002873.1 AGTAAAGTAAGAAAGTTGTGTAT AAGTTTGCACAGTGGTTGTATAAGGAATGTACATAC  
 266 FJ410797.2 AGTAAAGTAAGAAAGTTGTGTAT AAGTTTGCACAGTGGTTGTATAAGGAATGTACATAC  
 267 DQ458781.4 AGTAAAGTAAGAAAGTTGTGTAT AAGTTTGCACAGTGGTTGTATAAGGAATGTACATAC

**DHPV-U 1622F**

268 JN082231.1 ATCCACAATATAAGTGCCGCAGTTCATGATAGATGTAAGATGATTGTTGTAAGACTCA  
 269 AY008257.2 ATCCACAATATAAGTGCCGCAGTTCATGATAGATGTAAGATGATTGTTGTAAGACTCA  
 270 GU371276.1 ATCCACAATATAAGTGCCGCAGTTCATGATAGATGTAAGATGATTGTTGTAAGACTCA  
 271 EU588991.1 ATCCACAACATAAGTGCCGCAGTTCATGTTAGATGTAATGAAGATTGTTGTAAGACTCA  
 272 EU247528.1 ATCCACAACATAAGTGCTGCAGTTCATGTTAGATGTAATGATGAATTGTTGTAAGACTCA  
 273 DQ002873.1 ATCCACAACATAAGTGCTGCAGTTCATGATAGATGTAAGGATAATTGTTGTAAGACTCA  
 274 FJ410797.2 ATCCACAACATAAGTGCTGCAGTTCATGACAGATGTAAGATGATTGTTGTAAGACTCA  
 275 DQ458781.4 ATCCACAATATAAGTGCCGCAGTTCATGATAGATGTAATGATAATTGTTGTAAGACTTA  
 \*\*\*\*\*

276 JN082231.1 GCCAATAAAGTATGTAAGAACATATATGGTCCTCATTTACACATTTTATTGGAGAGTGTG  
 277 AY008257.2 GCCAATAAAGTATGTAAGAACATATATGGTCCTCATTTACACATTTTATTGGAGAGTGTG  
 278 GU371276.1 GCCAATAAAGTATGTAAGAACATATATGGTCCTCATTTACACATTTTATTGGAGAGTGTG  
 279 EU588991.1 GCCAATAAAGTATGTAAGAACATTTATGGTCCTCATTTACACATTTTATTGGAGAGTGTG  
 280 EU247528.1 GCCAATAAAGTATGTAAGAATATATATGGTCCTCATTTACACATTTTATTGGAGAGTGTG  
 281 DQ002873.1 GCCAATAAAGTATGTAAGAACATATACGGTCCTCATTTACACATTTTATTGGAGAGTGTG  
 282 FJ410797.2 GCCAATAAAGTATGTAAGAACATATATGGTCCTCATTTACACATTTTATTGGAGAGTGTG  
 283 DQ458781.4 GCCAATAAAGTATGTAAGAACATATATGGTCCTCATTTACACATTTTATTGGAGAGTGTG  
 \*\*\*\*\*

284 JN082231.1 AATGAGAATTGGAGTAAGAGTAGCAAGAGGGTTTTATTCCGCGGCTACGAGAAGATCCTA  
 285 AY008257.2 AATGAGAATTGGAGTAAGAGTAGCAAGAGGGTTTTATTCCGCGGCTACGAGAAGATCCTA  
 286 GU371276.1 AATGAGAATTGGAGTAAGAGTAGCAAGAGGGTTTTATTCCGCGGCTACGAGAAGATCCTA  
 287 EU588991.1 AATGAAAATTGGAGTAAAAGTAGCAAGAGGGTTTTATTCCGCGGCTACGAGAAGATCCTG  
 288 EU247528.1 AATGAGAATTGGAGTAAAAGTAGCAAGAGGGTTTTATTCCGCGGCTACGAGAAGATCCTG  
 289 DQ002873.1 AATGAAAATTGGAGTAAAAGTAGCAAGAGGGTTTTATTCCGCGGCTACGAGAAGATACTT  
 290 FJ410797.2 AACGAAACTGGAGTAAAAGTAGCAAGAGGGTTTTATTCCGAGGCTACGAGAAGATCCTG  
 291 DQ458781.4 AATGAAAATTGGAGTAAAAGTAGCAAGAGGATTTTATACCGCGGCTACGAGAAGATACTT  
 \*\* \* \* \* \*\*\*\*\*

292 JN082231.1 CAGCAGGAGAACAAGCAGCTATGGGAGGACCTA GGGACTACAGAAGACATC  
 293 AY008257.2 CAGCAGGAGAACAAGCAGCTATGGGAGGACCTA GGGACTACAGAAGACATC  
 294 GU371276.1 CAGCATGAAAACAACAGCTATGGGAGGACCTA GGGACTACAGAAGACATC  
 295 EU588991.1 CAGAACGAAACAAGCAGCTATGGGAGGACCTG GGGACTACAGAAGACATC  
 296 EU247528.1 CAACATGAACATAAACAACCTATGGGAAGACCTG GGGACTACAGAAGACATC  
 297 DQ002873.1 CAACACGACAACAACAACCTATGGGAGGACCTA GGGACTACAGAAGACATC  
 298 FJ410797.2 CAACACGACAACAAGCAACTATGGCAAGACTTG GGGACTACAGAAGACATC  
 299 DQ458781.4 CAGCATGAGAACAAGCAGCTATGGGAAGACCTG GGGACTACAGAAGACATC  
 \*\* \* \* \* \*\*\*\*\*

**DHPV-U 1887R**

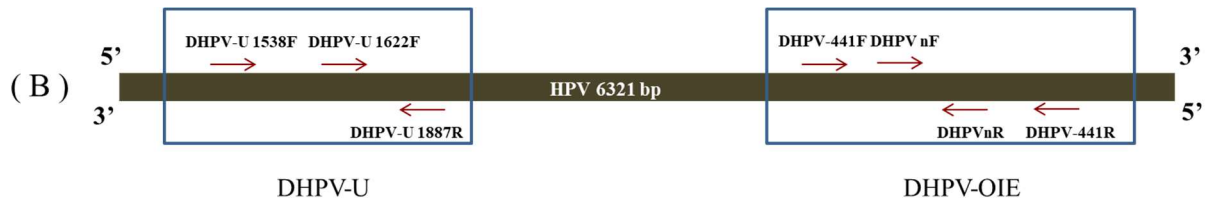

293  
 294



### 3.2. Specificity and sensitivity testing of the DHPV-U method

Using the semi-nested DHPV-U PCR protocol with DNA or cDNA templates derived from penaeid shrimp infected with the viruses WSSV, YHV, IMNV, IHNV and LSNV gave no amplicons (Fig. 2). In contrast, the DNA template from *M. rosenbergii* infected with DHPV gave a positive test result using the DHPV-U PCR protocol (lane 6). The results revealed no cross reactivity of DHPV-U primers with other common shrimp viruses (lanes 1-5).

**Figure 2.** Specificity testing for the DHPV-U PCR detection method. Agarose gel electrophoresis analyses of the DHPV-U reaction solutions by DNA or cDNA templates from YHV-infected shrimp (lane 1), LSNV-infected shrimp (lane 2), IMNV-infected shrimp (lane 3), WSSV-infected shrimp (lane 4), IHNV-infected shrimp (lane 5), and DHPV-infected prawn (lane 6). M = 2 log DNA marker, N = Negative Control, P = Positive control. The expected sizes of PCR products amplified by DHPV-U PCR were 266 and 350 bp.

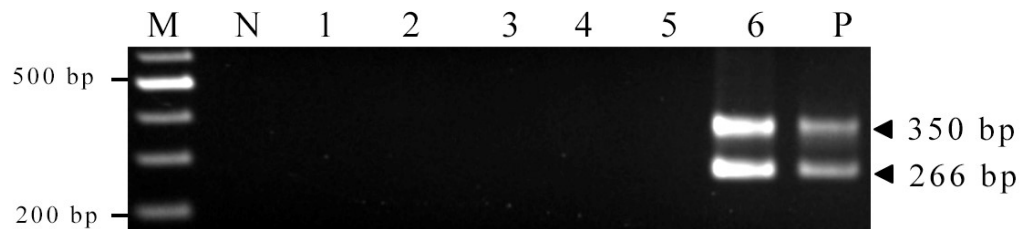

Testing the sensitivity of the DHPV-U method using a serially diluted plasmid template containing a DHPV target ( $0 - 2 \times 10^5$  plasmid copies per reaction tube) (Fig. 3), revealed that the semi-nested DHPV-U method could detect as little as 2 copies/reaction. A second test was carried out using templates that contained both DHPV-free shrimp DNA (20 ng/reaction) plus DHPV-U plasmid preparation from 0-200 plasmids/reaction. The results (Fig. 3B) show that the lowest copy number of DHPV-U plasmid that could be detected by the DHPV-U method was 50 copies when 20 ng of host DNA was included in the reaction mix. This revealed a strong negative influence of the host DNA on the sensitivity of the DHPV-U method. This effect has been studied and demonstrated in several models (Cogswell et al., 1996; Handschur et al., 2009). Cogswell et al. (1996) demonstrated that host DNA can interfere with specific DNA amplification for *Borrelia burgdorferi* by PCR and may even lead to false negative results. The sensitivity of pathogen detection is also reduced in next generation sequencing in specimens containing high background human DNA. Several methods have been proposed to solve this problem, including dilution of the template, concentration and extensive washing of the DNA template.

**Figure 3.** Sensitivity testing for the DHPV-U method. (A) Agarose gel electrophoresis analyses the DHPV-U amplicons from PCR using serially diluted DHPV-U plasmid templates at 0 to  $2 \times 10^5$  plasmids/reaction. (B) Agarose gel showing the effect of host DNA addition (20 ng/reaction) to reactions containing DHPV-U plasmid from 0-200 copies.

336

337

338

339

340

341

342

343

344

345

346

347

348

349

350

351

352

353

354

355

356

357

358

359

360

361

362

363

364

365

366

367

368

369

370

371

372

373

374

375

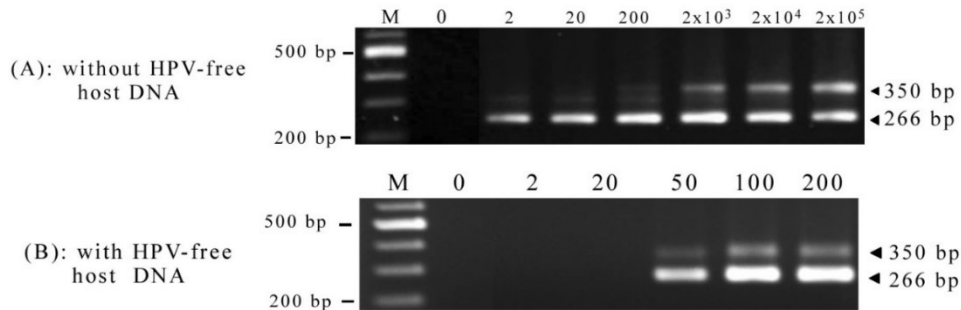

The method compares favorably with the sensitivity of the previously published OIE one-step PCR method (OIE, 2007) and the previously published nested PCR method (Manjanaik et al., 2005) for DHPV in *P. monodon*.

### 3.3 Histological analysis of DHPV-infected *M. rosenbergii*

To confirm the positive PCR results, histological analysis of the affected HP tissue was necessary to confirm the diagnosis since there were no specific gross signs to detect the presence DHPV. Histological examination of tissue sections from the fixed samples of *M. rosenbergii* PL revealed the presence of spherical to ovoid intranuclear inclusions in the HP tubule epithelial cells of some of the specimens. From the first Batch of 10 specimens, only 1 specimen showed typical DHPV-like lesions in the HP. From Batch 2 with 2 slides each with 7 specimens each (total 14), 6 showed DHPV like lesions. An example is shown in Fig 4. These results were sufficient to confirm the PCR results from the 2 batches of shrimp.

The intranuclear inclusions varied in size but were all eosinophilic, characteristic of early stage DHPV lesions (Figure 4, row 1, white arrows). These were similar to the suspected DHPV-like lesions previously observed in samples of *M. rosenbergii* PL and broodstock reported by (Gangnonngiw, et al., 2009). However, in the broodstock, some of the larger inclusions stained basophilic. The fixed hepatopancreas of a *P. monodon* specimens known to be infected with DHPV were used to compare lesions of similar morphology and staining characteristics in its HP tubule epithelial cells. Example photomicrographs are shown in Fig. 4 (row 1, white arrows).

### 3.4 *In situ* hybridization confirmed DHV infections in *M. rosenbergii*

To confirm that the DHPV-like histological lesions in the HP of the *M. rosenbergii* were associated with the positive DHPV-U PCR reactions, *in situ* hybridization assays were carried out using a DIG-labeled probe derived from a DHPV-U-PCR amplicon. Tissue sections from *M. rosenbergii* larvae from batches that tested positive using the DHPV-U PCR method and from *P. monodon* hepatopancreatic tissue known to be infected with DHPV both gave positive *in situ* hybridization reactions in the nuclei of HP tubule epithelial cells (dark staining against the brown counter-stain) using DIG-labeled probes for DHPV (Fig. 4, row 2). These reactions were at similar intensity and

376 in the same tissue areas where the intranuclear inclusions were seen with hematoxylin and eosin  
377 (H&E)-stained, adjacent tissue sections (**Fig 4, row 1**). No reactions occurred in the control slides  
378 processed with no probe present (**Figs. 4, row 3**).

379

380 **Figure 4.** Example photomicrographs of histopathology and ISH reactions with HP tissue of *M. rosenbergii*  
381 and *P. monodon*. **Row 1.** H&E staining showing DHPV-like intranuclear inclusions in tubule epithelial  
382 cells marked with white arrows. Inserts show magnified regions. **Row 2.** Positive ISH reactions (black  
383 staining) in locations matching the regions of the intranuclear inclusions in the adjacent sections in Row 1.  
384 **Row 3.** Negative controls for the ISH reactions (no probe). Asterisks in the adjacent tissue sections indicate  
385 that same relative position for the photomicrographs in each column.

386

387

388

389

390

391

392

393

394

395

396

397

398

399

400

401

402

403

404

405

406

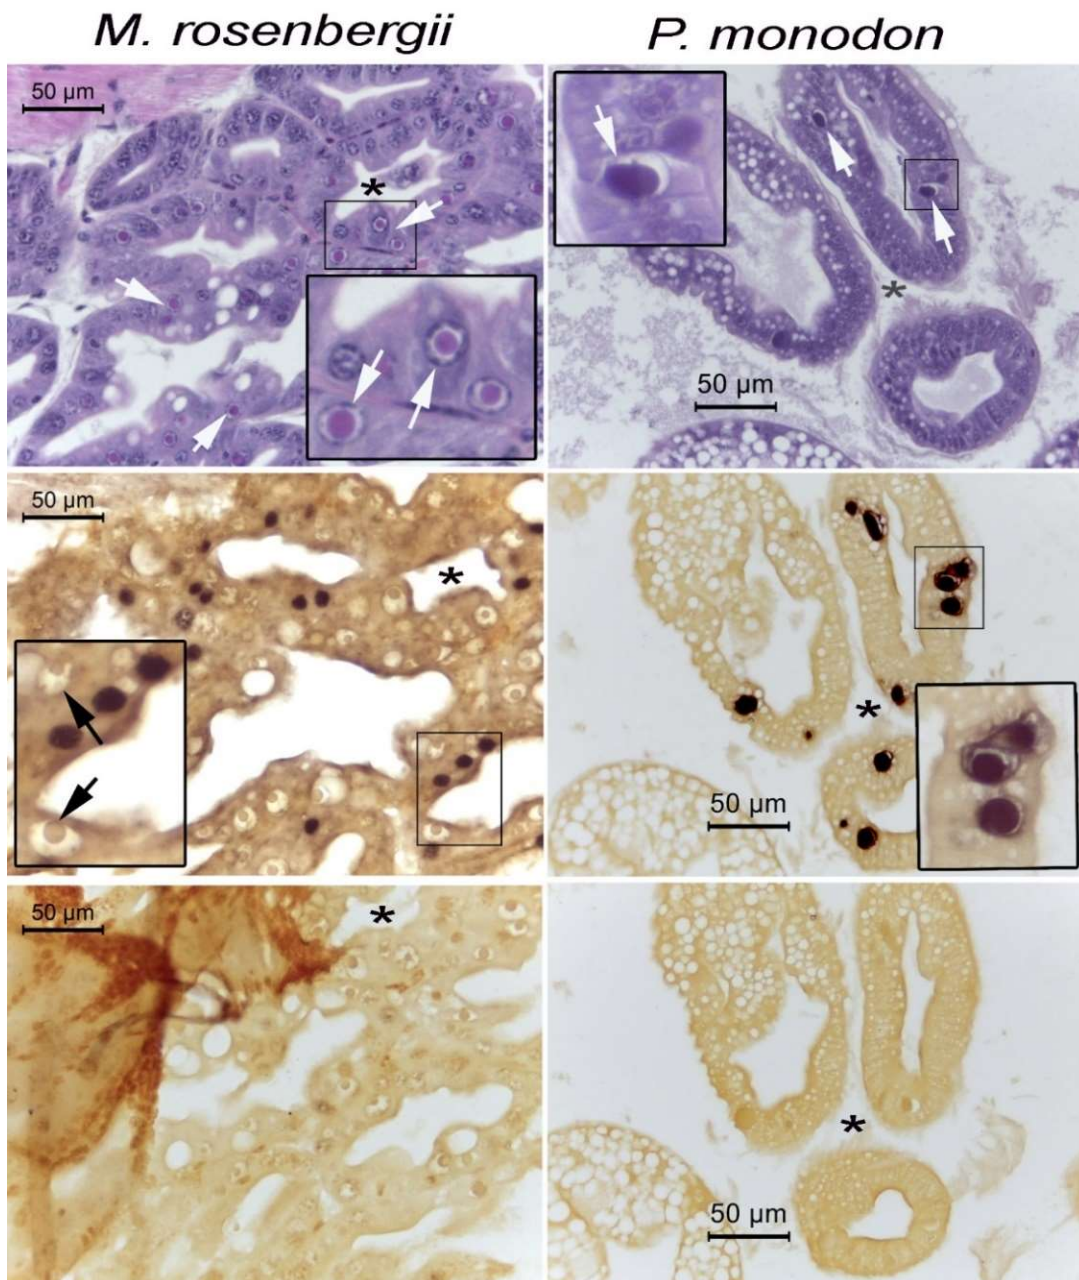

407 Curiously, the positive ISH reactions that occurred in the *M. rosenbergii* specimens did not arise  
408 from the intranuclear inclusions associated with DHPV infections but instead in nuclei without  
409 such inclusions present. In contrast, the ISH reactions in *P. monodon* did occur with DHPV  
410 inclusions. We have no explanation for this anomaly. We speculate that the inclusion structures or  
411 contents in *M. rosenbergii* may prevent hybridization with the probe in some unknown way, such  
412 that only nuclei undergoing genomic viral DNA synthesis prior to inclusion formation give positive  
413 ISH results. Our attempts to rectify the situation with additional proteinase K treatment or with  
414 sodium hydroxide treatment prior to the ISH reaction did not change the situation. This is curious  
415 because earlier work (Gangnonngiw, et al., 2009) showed by confocal laser microscopy that  
416 fluorescence from stained nucleic acid in the inclusions was lost or reduced by treatment with  
417 DNase 1 or with mungbean nuclease specific for single-stranded DNA, even though the inclusions  
418 remained intact. Thus, if the DNase enzyme could penetrate the structure of the inclusions, it is  
419 curious that the labeled nucleic acid probe apparently could not and/or was unable to hybridize  
420 with the viral DNA. Alternatively, it is possible that DHPV in *M. rosenbergii* is present in nuclei  
421 of normal histological appearance and that the distinctive, eosinophilic to basophilic inclusions  
422 arose from some direct or indirect associated cause, although to us this seems unlikely.

423

### 424 **3.5 Comparison of DHPV-OIE and DHPV-U with field samples**

425 These tests employed 13 DNA extracts from pooled PL samples (10 each) of *M. rosenbergii* that  
426 were suspected of being infected with DHPV and with 11 archived DNA extracts from *P. monodon*  
427 infected with DHPV1. When tested for DHPV using the OIE recommended method normally used  
428 for detection of DHPV in *P. monodon* (**Fig. 5A**), all 13 *M. rosenbergii* samples gave negative  
429 results. When the same DNA extracts were used as templates for the DHPV-U method 11/13 (85%)  
430 (**Fig. 5B**) gave positive test results. It is possible that the 2 samples of 10 that gave negative results  
431 did not contain even 1 PL infected with DHPV, since only 1 of the 10 PLs sampled for histological  
432 examination showed DHPV lesions. This indicated that DHPV was not highly prevalent in that  
433 batch of PLs such that an occasional sample of 10 might consist of uninfected individuals or might  
434 contain a lightly infected individual that yielded too little viral DNA to be detected after mixing  
435 with host DNA from 9 other uninfected individuals.

436

437 When the DHPV-O and DHPV-U methods were used with 11 archived DNA extracts from *P.*  
438 *monodon* samples that showed DHPV lesions, 11/11 samples gave positive amplicons with the  
439 DHPV-O method although the band for sample 11 was very light (indicating a low level infection)  
440 and does not show up in photograph in Fig. 5C. The DHPV-U method also gave but 11/11 positive  
441 amplicons with the *P. monodon* samples. This clearly revealed that the DHPV-U method could be  
442 used for the different DHPV types in *P. monodon* and *M. rosenbergii*.

443

444 Next, 5 PCR amplicons (350 bp) from *M. rosenbergii* were arbitrarily selected and subjected to  
445 sequencing (Macrogen, Korea) and analysis. All 5 sequences were nearly identical, differing from  
446 one another by only 1 or 2 bases, always at different positions (Supplementary Fig. 1). These gave

447 a consensus sequence that was used for an nBLAST search against the GenBank database. The top  
 448 hit of 100% coverage and 99.4% identity (311/313 bases, excluding the primers) was for *P.*  
 449 *monodon* hepadensovirus 1 (DQ002873.1) (Fig. 6).

450  
 451 **Figure 5.** Comparison of DHPV detection in 13 *M. rosenbergii* and 11 *P. monodon* samples using the  
 452 standard OIE detection method or the DHPV-U method. (A & B) Agarose gel results from using the 2  
 453 methods with *M. rosenbergii* samples and showing that the DHPV-OIE method does not work, while the  
 454 DHPV-U method does. (C & D) Agarose gel results from using the 2 methods with *P. monodon* samples  
 455 showing that both methods work with *P. monodon*. N = Negative control, M = 2 log DNA marker and P =  
 456 Positive control.

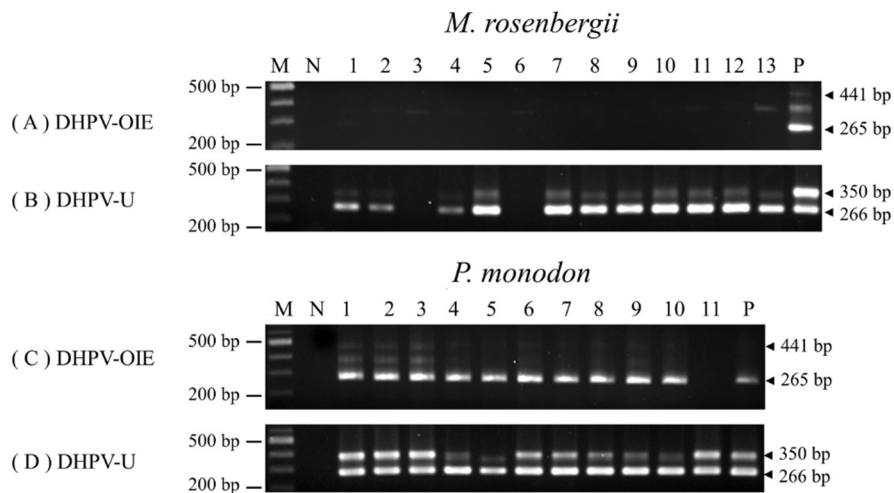

463  
 464  
 465  
 466  
 467  
 468  
 469  
 470 **Figure 6.** Sequence alignment obtained for the consensus sequence of 5 separate DHPV-U-PCR amplicon  
 471 clones obtained from *M. rosenbergii* with the matching region of the Blast-n top-hit *Penaeus monodon*  
 472 hepadensovirus 1 (DQ002873.1). There are two base differences giving a sequence identity of 348/350 =  
 473 99.4%. The first difference (position 48-51) is synonymous for serine while the second (position 163-165)  
 474 is non-synonymous but is a semi-conserved change from serine to glycine.

```

475 DQ002873.1 CCTCTTGTACATTTACTCTGGTCTCATTGTAAGTTTGAACATTGGAACGACAATGTC
476 Consensus CCTCTTGTACATTTACTCTGGTCTCATTGTAAGTTTGAACATTGGAATGACAATGTC
477 *****
478 DQ002873.1 AGTAAAGTAAGAAAGTTTGTGTATAAGTTTGCACAGTGGTTGTATAAGGAATGTACATAC
479 Consensus AGTAAAGTAAGAAAGTTTGTGTATAAGTTTGCACAGTGGTTGTATAAGGAATGTACATAC
480 *****
481 DQ002873.1 ATCCACAACATAAGTGCTGCAGTTCATGATAGATGTAAGGATAATTGTTGTAAAGACTCA
482 Consensus ATCCACAACATAAGTGCTGCAGTTCATGATAGATGTAAGGATCATTGTTGTAAAGACTCA
483 *****
484 DQ002873.1 GCCAATAAAGTATGTAAGAACATATACGGTCCTCATTACACATTTATTGGAGAGTGTCT
485 Consensus GCCAATAAAGTATGTAAGAACATATACGGTCCTCATTACACATTTATTGGAGAGTGTCT
486 *****
487 DQ002873.1 AATGAAAATTGGAGTAAAAGTAGCAAGAGGGTTTTATTCCGCGGCTACGAGAAGATACTT
488 Consensus AATGAAAATTGGAGTAAAAGTAGCAAGAGGGTTTTATTCCGCGGCTACGAGAAGATACTT
489 *****
490 DQ002873.1 CAACACGACAACAACAACATATGGGAGGACCTAGGACTACAGAAGACATC
491 Consensus CAACACGACAACAACAACATATGGGAGGACCTAGGACTACAGAAGACATC
492 *****
    
```

487 Overall, the results revealed that the DHPV-U method could be used to screen for DHPV in both  
488 *P. monodon* and *M. rosenbergii* in Thailand without any negative consequences in terms of  
489 sensitivity or specificity. Indeed, it is somewhat more sensitive than the DHPV-O method at 50  
490 copies when mixed with host DNA compare to 340 for the DHPV-O method (OIE, 2007). Some  
491 laboratories have already adopted the DHPV-U method since it provides some convenience when  
492 DHPV testing is being carried out with both species. On the other hand, the two methods together  
493 would be useful in determining whether the types of DHPV in *P. monodon* and *M. rosenbergii* are  
494 cross infective. This could now be determined easily in laboratory studies using the two methods  
495 to follow the infections.

496

## 497 **Conclusions**

498 The DHPV-U method described herein can be used to screen for DHPV in both *M. rosenbergii*  
499 and *P. monodon*. Indeed, it is currently being applied for the screening of broodstock and larvae  
500 in a program aimed at developing an SPF stock of *M. rosenbergii* in Thailand. It is hoped that such  
501 a stock would ultimately provide shrimp farmers with PL free of relevant major pathogens.  
502 However, there is still interest in determining the full sequence of the DHPV type or types  
503 prevalent in the natural and imported sources of *M. rosenbergii* broodstock that are currently being  
504 used in Thailand. Given the high sequence conservation in existing GenBank records for the target  
505 sequence of the DHPV-U method, it may be useful in broad, preliminary screening for previously  
506 unknown isolates of DHPV in other fresh water, brackish water or marine animals.

507

508 **Acknowledgements:** We would like to thank the financial support from the Royal Society  
509 International Collaboration Awards 2019, the Global Challenges Research Fund (GCRF) to Prof.  
510 Grant D. Stentiford (Cefas/UK) and Dr. Kallaya Sritunyalucksana (BIOTEC, NSTDA/Thailand).

511

## 512 **References**

- 513 Anderson, I.G., Law, A.T., Shariff, M., Nash, G., 1990. A parvo-like virus in the giant freshwater  
514 prawn, *Macrobrachium rosenbergii*. J. Invertebr. Pathol. 55, 447-449.
- 515 Bell, T.A., Lightner, D.V., 1988. A handbook of normal shrimp histology. World Aquaculture  
516 Society, Baton Rouge, LA.
- 517 Dhar, A.K., Robles-Sikisaka, R., Saksmerprome, V., Lakshman, D.K., 2014. Biology, genome  
518 organization, and evolution of parvoviruses in marine shrimp, Advances in Virus Research,  
519 pp. 85-139.
- 520 Flegel, T.W., Thamavit, V., Pasharawipas, T., Alday-Sanz, V., 1999. Statistical correlation  
521 between severity of hepatopancreatic parvovirus infection and stunting of farmed black  
522 tiger shrimp (*Penaeus monodon*). Aquaculture. 174, 197-206.
- 523 Flegel, T.W., Fegan, D.F., Kongsom, S., Vuthikornudomkit, S., Sriurairatana, S., Boonyaratpalin,  
524 S., Chantanachookhin, C., Vickers, J.E., Macdonald, O.D., 1992. Occurrence, diagnosis  
525 and treatment of shrimp diseases in Thailand. in: Fulks, W., Main, K.L. (Eds.), Diseases of  
526 Cultured Penaeid Shrimp in Asia and the United States. Oceanic Institute, Honolulu, HI,  
527 pp. 57-112.

- 528 Gangnonngiw, W., Kiatpathomchai, W., Sriurairatana, S., Laisutisan, K., Chuchird, N.,  
529 Limsuwan, C., Flegel, T.W., 2009. A parvo-like virus in the hepatopancreas of freshwater  
530 prawns *Macrobrachium rosenbergii* cultivated in Thailand. Dis Aquat Org. 85, 167-173.
- 531 Lightner, D., Redman, R., Moore, D., Park, M., 1993. Development and application of a simple  
532 and rapid diagnostic method to study hepatopancreatic parvovirus of penaeid shrimp.  
533 Aquaculture. 116, 15-23.
- 534 Lightner, D.V., 1996a. A handbook of pathology and diagnostic procedures for diseases of penaeid  
535 shrimp. World Aquaculture Society, Baton Rouge, LA.
- 536 Lightner, D.V., 1996b. A handbook of shrimp pathology and diagnosis procedures for diseases of  
537 cultured penaeid shrimp. World Aquaculture Society, Baton Rouge.
- 538 Lightner, D.V., Redman, R.M., Poulos, B.T., Mari, J.L., Bonami, J.R., Shariff, M., 1994.  
539 Distinction of HPV-type virus in *Penaeus chinensis* and *Macrobrachium rosenbergii* using  
540 a DNA probe. Asian Fish Sci. 7, 267-272.
- 541 Manjanaik, B., Umeha, K.R., Karunasagar, I., Karunasagar, I., 2005. Detection of  
542 hepatopancreatic parvovirus (HPV) in wild shrimp from India by nested polymerase chain  
543 reaction (PCR). Dis. Aquat. Organ. 63, 255-259.
- 544 Péntzes, J.J., Söderlund-Venermo, M., Canuti, M., Eis-Hübinger, A.M., Hughes, J., Cotmore, S.F.,  
545 Harrach, B., 2020. Reorganizing the family *Parvoviridae*: a revised taxonomy independent  
546 of the canonical approach based on host association. Arch. Virol., 1-14.
- 547 Phromjai, J., Boonsaeng, V., Withyachumnarnkul, B., Flegel, T.W., 2002. Detection of  
548 hepatopancreatic parvovirus in Thai shrimp *Penaeus monodon* by *in situ* hybridization,  
549 dot blot hybridization and PCR amplification. Dis Aquat Org. 51, 227-232.
- 550 Phromjai, J., Sukhumsirichart, W., Pantoja, C., Lightner, D.V., Flegel, T.W., 2001. Different  
551 reactions obtained using the same DNA detection reagents for Thai and Korean  
552 hepatopancreatic parvovirus of penaeid shrimp. Dis Aquat Org. 46, 153-158.
- 553 Sambrook, J., Russell, D.W., 2001 Molecular cloning: a laboratory manual 3rd Edition. Cold  
554 Spring Harbor Press, Cold Spring Harbor.
- 555 Sritunyalucksana, K., Apisawetakan, S., Boon-nat, A., Withyachumnarnkul, B., Flegel, T.W.,  
556 2006. A new RNA virus found in black tiger shrimp *Penaeus monodon* from Thailand.  
557 Virus Res. 118, 31-38.
- 558 Tang, K.F.J., Navarro, S.A., Lightner, D.V., 2007. PCR assay for discriminating between  
559 infectious hypodermal and hematopoietic necrosis virus (IHHNV) and virus-related  
560 sequences in the genome of *Penaeus monodon*. Dis. Aquat. Organ. 74, 165-170.
- 561 Tang, K.F.J., Pantoja, C.R., Lightner, D.V., 2008. Nucleotide sequence of a Madagascar  
562 hepatopancreatic parvovirus (HPV) and comparison of genetic variation among geographic  
563 isolates. Dis. Aquat. Organ. 80, 105-112.
- 564 Tangprasittipap, A., Srisala, J., Chouwdee, S., Somboon, M., Chuchird, N., Limsuwan, C.,  
565 Srisuvan, T., Flegel, T.W., Sritunyalucksana, K., 2013. The microsporidian  
566 *Enterocytozoon hepatopenaei* is not the cause of white feces syndrome in whiteleg shrimp  
567 *Penaeus (Litopenaeus) vannamei*. BMC Vet. Res. 9, 139.
- 568 Thitamadee, S., Prachumwat, A., Srisala, J., Sritunyalucksana, K., Flegel, T.W., Itsathitphaisarn,  
569 O., 2016. Review of current disease threats for cultivated penaeid shrimp in Asia.  
570 Aquaculture. 452, 69-87.
- 571 Walsh, R., La Fauce, K., Crockford, M., Jones, B., Owens, L., 2017. Genomic heterogeneity and  
572 prevalence of hepadensovirus in *Penaeus esculentus* from Western Australia, and *P.*  
573 *merguiensis* from the Gulf of Carpentaria, Australia. Aquaculture. 471, 43-48.
